# Supplementary material for: Biomarkers of aging and lung function in the normative aging study
Source: Aging (Albany NY). 2020 Jun 19;12(12):11942–66. doi: 10.18632/aging.103363 (PMC7343502; doi:10.18632/aging.103363)
Supplement: Supplementary Table [file aging-12-103363-s001..pdf]

## SUPPLEMENTARY TABLE

**Supplementary Table 1. Summary statistics of chronological age and different DNAm ages in 1, 070 visits among 696 elderly white men from the Normative Aging Study, 1999-2013.**

| Variable                  | mean $\pm$ SD    | Percentile |       |       |
|---------------------------|------------------|------------|-------|-------|
|                           |                  | 5th        | 50th  | 95th  |
| Chronological Age (years) | 73.48 $\pm$ 6.74 | 63.00      | 73.00 | 85.00 |
| Epigenetic aging          |                  |            |       |       |
| DNAm GrimAge (years)      | 72.72 $\pm$ 6.53 | 62.25      | 72.27 | 83.74 |
| DNAm PhenoAge (years)     | 65.45 $\pm$ 7.72 | 53.24      | 65.21 | 78.13 |
| Horvath's clock (years)   | 73.57 $\pm$ 7.40 | 62.54      | 72.99 | 86.43 |
| Hannum's clock (years)    | 77.47 $\pm$ 6.97 | 66.54      | 77.44 | 89.24 |

Abbreviations: SD = standard deviation; TL = Telomere length; mtDNA-CN = mitochondrial DNA copy number.
